# Supplementary material for: A UPR-independent infection-specific role for a BiP/GRP78 protein in the control of antimicrobial peptide expression in C. elegans epidermis
Source: PubMed Central journal article supplement — Virulence. 2012 May 1;3(3):299–308. doi: 10.4161/viru.20384 (PMC3442842; doi:10.4161/viru.20384), 2012-05-01
Supplement: viru-3-299-s01.pdf [file viru-3-299-s01.pdf]

**Supplemental Material to:**

Carole Couillault, Patrick Fourquet, Matthieu Pophillat and Jonathan J. Ewbank. A UPR-independent infection-specific role for a BiP/GRP78 protein in the control of the antimicrobial peptide expression in *C. elegans* epidermis. *Virulence* 2012; 3(3);

<http://dx.doi.org/viru.20384>

<http://www.landesbioscience.com/journals/virulence/article/20384>

## Supplementary Text

### Primers sequences (5'-3'):

Fw *gpa-12\** JEP1976:

ggggacaagtttgtaaaaaagcaggcttaATGGTATGCTGTTTCGGGAA

Rv *gpa-12\** JEP1977:

ggggaccactttgtacaagaaagctgggtaTTACTGCATCATGAGAGTCT

Fw *xbp-1* JEP1594: CGTCGTCTACGAAGAAGAAGTCGTC

Rv *xbp-1* JEP1595: GATGATAGTTAGATACATATCCCACTG

Fw *eft-2* JEP1596: TCGAAATTCAATGCCCAGAAG

Rv *eft-2* JEP1597: CTCCTCGAAAACGTGTCCTCTT

### Worms analyzed in each Biosort experiment (from left to right)

Figure 2A: 63; 150; 105; 144; 109; 137; 144; 210; 143; 182; 146; 154; 152; 143; 151; 165

Figure 2B: 217; 136; 50; 20; 47; 265; 282; 91; 66; 39; 44; 56; 30; 25; 23

Figure 3A: 41; 84; 58; 80

Figure 3B: 15; 31; 14; 30; 25; 29; 13; 55

Figure S1: 61; 78; 36; 41; 133; 86; 193; 159

### Bibliographic references for EASE class lists in Tables 4 and S2.

1. Boehnisch C, Wong D, Habig M, Isermann K, Michiels NK, Roeder T, et al. Protist-type lysozymes of the nematode *Caenorhabditis elegans* contribute to resistance against pathogenic *Bacillus thuringiensis*. PLoS One 2011; 6:e24619.
2. Bogaerts A, Temmerman L, Boerjan B, Husson SJ, Schoofs L, Verleyen P. A differential proteomics study of *Caenorhabditis elegans* infected with *Aeromonas hydrophila*. Dev Comp Immunol 2010; 34:690-8.
3. Budovskaya YV, Wu K, Southworth LK, Jiang M, Tedesco P, Johnson TE, et al. An *elt-3/elt-5/elt-6* GATA transcription circuit guides aging in *C. elegans*. Cell 2008; 134:291-303.
4. Coolon JD, Jones KL, Todd TC, Carr BC, Herman MA. *Caenorhabditis elegans* genomic response to soil bacteria predicts environment-specific genetic effects on life history traits. PLoS Genet 2009; 5:e1000503.

5. Halaschek-Wiener J, Khattra JS, McKay S, Pouzyrev A, Stott JM, Yang GS, et al. Analysis of long-lived *C. elegans daf-2* mutants using serial analysis of gene expression. *Genome Res* 2005; 15:603-15.
6. Huffman DL, Abrami L, Sasik R, Corbeil J, van der Goot FG, Aroian RV. Mitogen-activated protein kinase pathways defend against bacterial pore-forming toxins. *Proc Natl Acad Sci U S A* 2004; 101:10995-1000.
7. Irazoqui JE, Troemel ER, Feinbaum RL, Luhachack LG, Cezairliyan BO, Ausubel FM. Distinct pathogenesis and host responses during infection of *C. elegans* by *P. aeruginosa* and *S. aureus*. *PLoS Pathog* 2010; 6:e1000982.
8. Kaji H, Kamiie J, Kawakami H, Kido K, Yamauchi Y, Shinkawa T, et al. Proteomics reveals N-linked glycoprotein diversity in *Caenorhabditis elegans* and suggests an atypical translocation mechanism for integral membrane proteins. *Mol Cell Proteomics* 2007; 6:2100-9.
9. Kim SK, Lund J, Kiraly M, Duke K, Jiang M, Stuart JM, et al. A gene expression map for *Caenorhabditis elegans*. *Science* 2001; 293:2087-92.
10. Lee W, Kim KR, Singaravelu G, Park BJ, Kim DH, Ahnn J, et al. Alternative chaperone machinery may compensate for calreticulin/calnexin deficiency in *Caenorhabditis elegans*. *Proteomics* 2006; 6:1329-39.
11. Love DC, Ghosh S, Mondoux MA, Fukushige T, Wang P, Wilson MA, et al. Dynamic O-GlcNAc cycling at promoters of *Caenorhabditis elegans* genes regulating longevity, stress, and immunity. *Proceedings of the National Academy of Sciences of the United States of America* 2010; 107:7413-8.
12. McCarroll SA, Murphy CT, Zou S, Pletcher SD, Chin CS, Jan YN, et al. Comparing genomic expression patterns across species identifies shared transcriptional profile in aging. *Nat Genet* 2004; 36:197-204.
13. McElwee JJ, Schuster E, Blanc E, Thomas JH, Gems D. Shared transcriptional signature in *Caenorhabditis elegans* Dauer larvae and long-lived *daf-2* mutants implicates detoxification system in longevity assurance. *J Biol Chem* 2004; 279:44533-43.
14. Murphy CT, McCarroll SA, Bargmann CI, Fraser A, Kamath RS, Ahringer J, et al. Genes that act downstream of DAF-16 to influence the lifespan of *Caenorhabditis elegans*. *Nature* 2003; 424:277-83.
15. Oliveira RP, Porter Abate J, Dilks K, Landis J, Ashraf J, Murphy CT, et al. Condition-adapted stress and longevity gene regulation by *Caenorhabditis elegans* SKN-1/Nrf. *Aging cell* 2009; 8:524-41.
16. Park SK, Tedesco PM, Johnson TE. Oxidative stress and longevity in *Caenorhabditis elegans* as mediated by SKN-1. *Aging cell* 2009; 8:258-69.
17. Pukkila-Worley R, Ausubel FM, Mylonakis E. *Candida albicans* infection of *Caenorhabditis elegans* induces antifungal immune defenses. *PLoS Pathog* 2011; 7:e1002074.
18. Reichert K, Menzel R. Expression profiling of five different xenobiotics using a *Caenorhabditis elegans* whole genome microarray. *Chemosphere* 2005; 61:229-37.
19. Thyagarajan B, Blaszcak AG, Chandler KJ, Watts JL, Johnson WE, Graves BJ. ETS-4 is a transcriptional regulator of life span in *Caenorhabditis elegans*. *PLoS Genet* 2010; 6.

20. Towers PR, Lescure P, Baban D, Malek JA, Duarte J, Jones E, et al. Gene expression profiling studies on *Caenorhabditis elegans* dystrophin mutants *dys-1(cx-35)* and *dys-1(cx18)*. *Genomics* 2006; 88:642-9.
21. Troemel ER, Chu SW, Reinke V, Lee SS, Ausubel FM, Kim DH. p38 MAPK regulates expression of immune response genes and contributes to longevity in *C. elegans*. *PLoS Genet* 2006; 2:e183.
22. Vinuela A, Snoek LB, Riksen JA, Kammenga JE. Genome-wide gene expression analysis in response to organophosphorus pesticide chlorpyrifos and diazinon in *C. elegans*. *PLoS One* 2010; 5:e12145.
23. Wong D, Bazopoulou D, Pujol N, Tavernarakis N, Ewbank JJ. Genome-wide investigation reveals pathogen-specific and shared signatures in the response of *Caenorhabditis elegans* to infection. *Genome Biol* 2007; 8:R194.

**Table S1.** Descriptions of the genes corresponding to the 68 differentially represented proteins. The information is derived from WormMart WS220.

**Table S2.** Structural and functional categories for genes corresponding to the 68 differentially represented proteins. An edited output from EASE, generated using an in-house database<sup>4</sup> is shown. Results are restricted to those with a probability > 0.01 (Fisher exact test). The categories derived from 2D gel electrophoresis-based studies are highlighted in green; those related to infection are in blue, and those related to stress are in red.

| Gene WB ID      | Gene Public ID | Sequence Na | Gene Description (Concise)                                                                                                                                                                                                                                                                                                                                                                                                                                                                                                                                                                                                                  | KOG Title                                                                                  |
|-----------------|----------------|-------------|---------------------------------------------------------------------------------------------------------------------------------------------------------------------------------------------------------------------------------------------------------------------------------------------------------------------------------------------------------------------------------------------------------------------------------------------------------------------------------------------------------------------------------------------------------------------------------------------------------------------------------------------|--------------------------------------------------------------------------------------------|
| WBGene00009583  | aagr-3         | F40F9.6     |                                                                                                                                                                                                                                                                                                                                                                                                                                                                                                                                                                                                                                             | Glucosidase II catalytic (alpha) subunit and related enzymes, glycosyl hydrolase family 31 |
| WBGene00000040  | aco-1          | ZK455.1     | aco-1 encodes an aconitase that is homologous to mammalian iron regulatory protein-1 (IRP1); aco-1 activity is required for normal RNA-binding translational regulator IRP (aconitase superfamily)                                                                                                                                                                                                                                                                                                                                                                                                                                          |                                                                                            |
| WBGene000000066 | act-4          | M03F4.2     | act-4 encodes an actin isoform that is most similar to act-2 in amino acid sequence; an act-4 reporter gene is expressed in body wall muscle                                                                                                                                                                                                                                                                                                                                                                                                                                                                                                | Actin and related proteins                                                                 |
| WBGene000000067 | act-5          | T25C8.2     | an ortholog of human cytoplasmic actin; and is expressed only in microvillous intestinal cells and excretory cell.                                                                                                                                                                                                                                                                                                                                                                                                                                                                                                                          | Actin and related proteins                                                                 |
| WBGene000000229 | atp-2          | C34E10.6    | atp-2 encodes the beta subunit of the soluble, catalytic F1 portion of ATP synthase (mitochondrial respiratory chain [MRC] complex F0F1-type ATP synthase, beta subunit)                                                                                                                                                                                                                                                                                                                                                                                                                                                                    |                                                                                            |
| WBGene000000479 | cgh-1          | C07H6.5     | cgh-1 encodes a putative DEAD-box RNA helicase, orthologous to budding yeast Dhh1p, fission yeast Ste13p, Drosophila ME31B, ATP-dependent RNA helicase                                                                                                                                                                                                                                                                                                                                                                                                                                                                                      |                                                                                            |
| WBGene000000776 | cpl-1          | T03E6.7     | cpl-1 encodes a member of the cathepsin L-like cysteine protease family required for embryonic viability and normal growth; encodes Cysteine proteinase Cathepsin L                                                                                                                                                                                                                                                                                                                                                                                                                                                                         |                                                                                            |
| WBGene000000802 | crt-1          | Y38A10A.5   | crt-1 encodes an ortholog of calreticulin (a calcium-binding molecular chaperone of the endoplasmic reticulum); crt-1 is dispensable for embryonic viability                                                                                                                                                                                                                                                                                                                                                                                                                                                                                | Calreticulin                                                                               |
| WBGene00010266  | dct-18         | F58G1.4     |                                                                                                                                                                                                                                                                                                                                                                                                                                                                                                                                                                                                                                             | Unnamed protein                                                                            |
| WBGene00001000  | dim-1          | C18A11.7    | dim-1 encodes novel proteins containing three immunoglobulin-like repeats in the carboxy terminus; dim-1 was originally identified in Drosophila                                                                                                                                                                                                                                                                                                                                                                                                                                                                                            | Immunoglobulin and related proteins                                                        |
| WBGene00018846  | eef-1B.1       | F54H12.6    |                                                                                                                                                                                                                                                                                                                                                                                                                                                                                                                                                                                                                                             | Elongation factor 1 beta/delta chain                                                       |
| WBGene00012768  | eef-1B.2       | Y41E3.10    |                                                                                                                                                                                                                                                                                                                                                                                                                                                                                                                                                                                                                                             | Elongation factor 1 beta/delta chain                                                       |
| WBGene00001167  | eef-2          | F25H5.4     | eef-2 encodes a homolog of translation elongation factor 2 (EF-2), a GTP-binding protein essential for the elongation phase of protein synthesis                                                                                                                                                                                                                                                                                                                                                                                                                                                                                            | Elongation factor 2                                                                        |
| WBGene00001598  | glh-1          | T21G5.3     | glh-1 encodes a putative DEAD-box RNA helicase that contains four CCHC zinc fingers and is homologous to Drosophila VASA, a GTP-dependent RNA helicase                                                                                                                                                                                                                                                                                                                                                                                                                                                                                      |                                                                                            |
| WBGene00001685  | gpd-3          | K10B3.7     | gpd-3 encodes a predicted glyceraldehyde 3-phosphate dehydrogenase that affects embryonic viability; GPD-3 interacts with LIN-10                                                                                                                                                                                                                                                                                                                                                                                                                                                                                                            | Glyceraldehyde 3-phosphate dehydrogenase                                                   |
| WBGene00001686  | gpd-4          | F33H1.2     | gpd-4 encodes one of four C. elegans glyceraldehyde-3-phosphate dehydrogenases (GAPDHs); by homology, GPD-4 is predicted to be a GTP-dependent RNA helicase                                                                                                                                                                                                                                                                                                                                                                                                                                                                                 | Glyceraldehyde 3-phosphate dehydrogenase                                                   |
| WBGene00001840  | hel-1          | C26D10.2    | hel-1 encodes an ortholog of human 56-kD U2AF65 associated protein (UAP56) that is required for exporting mRNAs from the nucleus                                                                                                                                                                                                                                                                                                                                                                                                                                                                                                            | ATP-dependent RNA helicase                                                                 |
| WBGene00002007  | hsp-3          | C15H9.6     | hsp-3 encodes one of two C. elegans heat shock response 70 (hsp70) proteins homologous to mammalian grp78/BiP (glucose regulated protein 78/BiP/KAR2, HSP70 superfamily)                                                                                                                                                                                                                                                                                                                                                                                                                                                                    | Molecular chaperones GRP78/BiP/KAR2, HSP70 superfamily                                     |
| WBGene00002025  | hsp-60         | Y22D7AL.5   | hsp-60 encodes a mitochondrial-specific chaperone that is a member of the GroE/Hsp10/60 superfamily of molecular chaperone Mitochondrial chaperonin, Cpn60/Hsp60p                                                                                                                                                                                                                                                                                                                                                                                                                                                                           | Mitochondrial chaperonin, Cpn60/Hsp60p                                                     |
| WBGene00002053  | ifb-1          | F10C1.2     | ifb-1 (also known as vab-21) encodes two isoforms of an essential intermediate filament protein that is coexpressed with the essential nuclear envelope protein lamin, intermediate filament superfamily                                                                                                                                                                                                                                                                                                                                                                                                                                    | Nuclear envelope protein lamin, intermediate filament superfamily                          |
| WBGene00002056  | ifc-2          | M6.1        | ifc-2 encodes three isoforms of an intermediate filament protein dispensable for viability but required for normal movement, germline development and sex determination                                                                                                                                                                                                                                                                                                                                                                                                                                                                     | Nuclear envelope protein lamin, intermediate filament superfamily                          |
| WBGene00002067  | ifp-1          | C43C3.1     | ifp-1 encodes a nonessential intermediate filament protein; IFP-1 is predicted to function as a structural component of the cytoskeleton                                                                                                                                                                                                                                                                                                                                                                                                                                                                                                    | Nuclear envelope protein lamin, intermediate filament superfamily                          |
| WBGene00002083  | inf-1          | F57B9.6     | inf-1 encodes a protein with high similarity to eukaryotic initiation factor 4A.                                                                                                                                                                                                                                                                                                                                                                                                                                                                                                                                                            | Translation initiation factor 4F, helicase subunit (eIF-4A) and related helicases          |
| WBGene00002244  | laf-1          | Y71H2AM.19  | laf-1 encodes a DEAD-box RNA helicase; laf-1 is required for embryonic development and sex determination; laf-1 was identified in screens for dominant suppressors of the sterility produced by gain-of-function fem-3 mutations; when homozygous, laf-1 mutations result in embryonic and larval lethality and when heterozygous, feminization of XX and XO animals; reporter gene analyses indicate that wild-type laf-1 activity is required for proper translational repression of tra-2 mRNA via its 3'UTR; when expressed in embryos, LAF-1 localizes predominantly to the cytoplasm with additional localization seen in P granules. |                                                                                            |
| WBGene00002263  | lea-1          | K08H10.1    | The lea-1 gene encodes a protein that is predicted to be hydrophilic and heat-resistant, and that might participate in anhydrobiosis                                                                                                                                                                                                                                                                                                                                                                                                                                                                                                        | Uncharacterized conserved protein                                                          |
| WBGene00002269  | lec-6          | Y55B1AR.1   | lec-6 encodes a 'proto' type galectin (beta-galactosyl-binding lectin) containing a single carbohydrate recognition domain; by homology, Lec-6 is predicted to be a beta-galactosyl-binding lectin                                                                                                                                                                                                                                                                                                                                                                                                                                          | Galectin, galactose-binding lectin                                                         |
| WBGene00003052  | lmn-1          | DY3.2       | lmn-1 encodes the sole C. elegans nuclear lamin; lmn-1 is an essential gene that is required for a number of nuclear processes, including transcription, DNA replication, and cell division                                                                                                                                                                                                                                                                                                                                                                                                                                                 | Nuclear envelope protein lamin, intermediate filament superfamily                          |
| WBGene00003119  | mac-1          | Y48C3A.7    | mac-1 encodes a AAA ATPase (ATPase associated with a variety of cellular activities) most closely related to the ATPase subfamily Nuclear AAA ATPase (VCP subfamily)                                                                                                                                                                                                                                                                                                                                                                                                                                                                        | Nuclear AAA ATPase (VCP subfamily)                                                         |
| WBGene00003161  | mdf-2          | Y69A2AR.30  | mdf-2 encodes the C. elegans ortholog of the Mad2p spindle assembly checkpoint protein; mdf-2 activity is essential for regulating the spindle assembly checkpoint                                                                                                                                                                                                                                                                                                                                                                                                                                                                          | Spindle assembly checkpoint protein                                                        |
| WBGene00003369  | mlc-1          | C36E6.3     | mlc-1 encodes a muscle regulatory myosin light chain that is nearly identical to MLC-2 and functions redundantly with MLC-2 in muscle                                                                                                                                                                                                                                                                                                                                                                                                                                                                                                       | Myosin regulatory light chain, EF-Hand protein superfamily                                 |
| WBGene00019940  | npp-21         | R07G3.3     |                                                                                                                                                                                                                                                                                                                                                                                                                                                                                                                                                                                                                                             |                                                                                            |
| WBGene00021562  | nuo-5          | Y45G12B.1   | nuo-5 is orthologous to human NADH-UBIQUINONE OXIDOREDUCTASE Fe-S PROTEIN 1 (NDUFS1; OMIM:157655), which when mutated causes NADH-ubiquinone oxidoreductase deficiency                                                                                                                                                                                                                                                                                                                                                                                                                                                                      | NADH-ubiquinone oxidoreductase, NDUFS1/75 kDa subunit                                      |
| WBGene00003929  | pat-2          | F54F2.1     | pat-2 encodes an alpha integrin subunit; during embryogenesis, pat-2 is essential for body wall muscle assembly and function                                                                                                                                                                                                                                                                                                                                                                                                                                                                                                                | Integrin alpha subunit                                                                     |
| WBGene00003963  | pdi-2          | C07A12.4    |                                                                                                                                                                                                                                                                                                                                                                                                                                                                                                                                                                                                                                             | Protein disulfide isomerase (prolyl 4-hydroxylase beta subunit)                            |
| WBGene00004408  | rfa-0          | F25H2.10    | rfa-0 encodes an acidic ribosomal subunit protein P0.                                                                                                                                                                                                                                                                                                                                                                                                                                                                                                                                                                                       | 60S acidic ribosomal protein P0                                                            |
| WBGene00004415  | rpl-4          | B0041.4     | rpl-4 encodes a large ribosomal subunit L4 protein.                                                                                                                                                                                                                                                                                                                                                                                                                                                                                                                                                                                         | Ribosomal protein RPL1/RPL2/RL4L4                                                          |
| WBGene00004754  | sec-23         | Y113G7A.3   |                                                                                                                                                                                                                                                                                                                                                                                                                                                                                                                                                                                                                                             | Vesicle coat complex COPII, subunit SEC23                                                  |
| WBGene00010790  | sodh-1         | K12G11.3    |                                                                                                                                                                                                                                                                                                                                                                                                                                                                                                                                                                                                                                             | Alcohol dehydrogenase, class V                                                             |
| WBGene00006536  | tbb-1          | K01G5.7     | This gene encodes a homolog of mammalian beta-tubulin (TUBB) that is expressed at high levels in the germline; TBB-1 is redundant with TBB-2                                                                                                                                                                                                                                                                                                                                                                                                                                                                                                | Beta tubulin                                                                               |
| WBGene00006537  | tbb-2          | C36E8.5     | tbb-2 encodes a homolog of mammalian beta-tubulin (TUBB) that is expressed at high levels in the germline; TBB-2 is redundant with TBB-1                                                                                                                                                                                                                                                                                                                                                                                                                                                                                                    | Beta tubulin                                                                               |
| WBGene00007000  | tufm-1         | Y71H2AM.23  |                                                                                                                                                                                                                                                                                                                                                                                                                                                                                                                                                                                                                                             | Mitochondrial translation elongation factor Tu                                             |
| WBGene00006715  | ubc-20         | F40G9.3     |                                                                                                                                                                                                                                                                                                                                                                                                                                                                                                                                                                                                                                             | Ubiquitin-protein ligase                                                                   |
| WBGene00006789  | unc-54         | F11C3.3     | unc-54 encodes a muscle myosin class II heavy chain (MHC B); UNC-54 is the major myosin heavy chain expressed in C. elegans muscle                                                                                                                                                                                                                                                                                                                                                                                                                                                                                                          | Myosin class II heavy chain                                                                |
| WBGene00006819  | unc-87         | F08B6.4     | unc-87 encodes, through alternative splicing, two proteins that are required to maintain the structure of myofilaments in body wall muscle                                                                                                                                                                                                                                                                                                                                                                                                                                                                                                  | Unnamed protein                                                                            |
| WBGene00006888  | vbh-1          | Y54E10A.9   | vbh-1 encodes a DEAD-box RNA helicase with similarity to Drosophila Vasa and Belle; vbh-1 activity is required for the proper timing of germline development                                                                                                                                                                                                                                                                                                                                                                                                                                                                                | ATP-dependent RNA helicase                                                                 |
| WBGene00013025  | vha-13         | Y49A3A.2    | vha-13 encodes an ortholog of subunit A of the cytoplasmic (V1) domain of vacuolar proton-translocating ATPase (V-ATPase); V1-ATPase is involved in vacuolar acidification                                                                                                                                                                                                                                                                                                                                                                                                                                                                  | Vacuolar H <sup>+</sup> -ATPase V1 sector, subunit A                                       |
| WBGene00006925  | vit-1          | K09F5.2     |                                                                                                                                                                                                                                                                                                                                                                                                                                                                                                                                                                                                                                             | Predicted lipoprotein                                                                      |
| WBGene00006926  | vit-2          | C42D8.2     | The vit-2 gene encodes the vitellogenin homolog YP170.                                                                                                                                                                                                                                                                                                                                                                                                                                                                                                                                                                                      | Predicted lipoprotein                                                                      |
| WBGene00006927  | vit-3          | F59D8.1     | vit-3 encodes a vitellogenin, a precursor of the lipid-binding protein related to vertebrate vitellogenins and mammalian ApoB-10                                                                                                                                                                                                                                                                                                                                                                                                                                                                                                            | Predicted lipoprotein                                                                      |
| WBGene00006928  | vit-4          | F59D8.2     |                                                                                                                                                                                                                                                                                                                                                                                                                                                                                                                                                                                                                                             | Predicted lipoprotein                                                                      |
| WBGene00006930  | vit-6          | K07H8.6     | vit-6 encodes a 180 kd vitellogenin precursor protein that is cleaved into two smaller yolk proteins, YP115 and YP88.                                                                                                                                                                                                                                                                                                                                                                                                                                                                                                                       | Predicted lipoprotein                                                                      |
| WBGene00007143  | B0334.3        | B0334.3     |                                                                                                                                                                                                                                                                                                                                                                                                                                                                                                                                                                                                                                             | Thiamine pyrophosphate-requiring enzyme                                                    |
| WBGene00007463  | C08H9.2        | C08H9.2     |                                                                                                                                                                                                                                                                                                                                                                                                                                                                                                                                                                                                                                             | Vigilin                                                                                    |
| WBGene00016630  | C44B7.10       | C44B7.10    |                                                                                                                                                                                                                                                                                                                                                                                                                                                                                                                                                                                                                                             | Acetyl-CoA hydrolase                                                                       |
| WBGene00008607  | F09B12.3       | F09B12.3    |                                                                                                                                                                                                                                                                                                                                                                                                                                                                                                                                                                                                                                             | Uncharacterized conserved protein Lama                                                     |
| WBGene00009812  | F47B10.1       | F47B10.1    |                                                                                                                                                                                                                                                                                                                                                                                                                                                                                                                                                                                                                                             | Succinyl-CoA synthetase, beta subunit                                                      |
| WBGene00019017  | F57F4.4        | F57F4.4     |                                                                                                                                                                                                                                                                                                                                                                                                                                                                                                                                                                                                                                             | Unnamed protein                                                                            |

|                |            |            |                                                                                                                                       |                                                                                                       |
|----------------|------------|------------|---------------------------------------------------------------------------------------------------------------------------------------|-------------------------------------------------------------------------------------------------------|
| WBGene00010419 | H28O16.1   | H28O16.1   |                                                                                                                                       | F0F1-type ATP synthase, alpha subunit                                                                 |
| WBGene00010695 | K08H10.2   | K08H10.2   | The K08H10.2 gene encodes a protein (K08H10.2A) that is predicted to be hydrophilic and heat-resistant, and that might participate in | Uncharacterized conserved protein                                                                     |
| WBGene00019900 | R05G6.7    | R05G6.7    |                                                                                                                                       | Porin/voltage-dependent anion-selective channel protein                                               |
| WBGene00011480 | T05E11.3   | T05E11.3   | T05E11.3 encodes the C. elegans ortholog of the Hsp90 family member and endoplasmic reticulum (ER) chaperone GRP94/GP96               | Endoplasmic reticulum glucose-regulated protein (GRP94/endoplasmic reticulum chaperone), HSP90 family |
| WBGene00011771 | T14G8.3    | T14G8.3    | T14G8.3 encodes an ortholog of hypoxia-upregulated vertebrate proteins such as human HYOU1; T14G8.3, its C. elegans paralog           | Molecular chaperones GRP170/SIL1, HSP70 superfamily                                                   |
| WBGene00020696 | T22F3.3    | T22F3.3    | T22F3.3 is orthologous to the human gene MUSCLE GLYCOGEN PHOSPHORYLASE (PYGM; OMIM:232600), which when mutated in                     | Glycogen phosphorylase                                                                                |
| WBGene00020781 | T24H7.2    | T24H7.2    | T24H7.2 encodes an ortholog of hypoxia-upregulated vertebrate proteins such as human HYOU1; T24H7.2, its C. elegans paralog           | Molecular chaperones GRP170/SIL1, HSP70 superfamily                                                   |
| WBGene00012722 | Y39G8B.1   | Y39G8B.1   |                                                                                                                                       | Aldo/keto reductase family proteins                                                                   |
| WBGene00012964 | Y48A6B.3   | Y48A6B.3   |                                                                                                                                       | Box H/ACA snoRNP component, involved in ribosomal RNA pseudouridylation                               |
| WBGene00022089 | Y69A2AR.18 | Y69A2AR.18 |                                                                                                                                       | F0F1-type ATP synthase, gamma subunit                                                                 |
| WBGene00014095 | ZK829.4    | ZK829.4    | ZK829.4 encodes a putative glutamate dehydrogenase, required in mass RNAi assays for normal fertility and rapid growth, that is       | Glutamate/leucine/phenylalanine/valine dehydrogenases                                                 |

| Gene Category                                                                                      | List Hits | List Total | Population I | Population † | Probability | Bonferroni | Gene Sequence Name                                                                                                                                                                                                                      |
|----------------------------------------------------------------------------------------------------|-----------|------------|--------------|--------------|-------------|------------|-----------------------------------------------------------------------------------------------------------------------------------------------------------------------------------------------------------------------------------------|
| >=2 down daf-2 (D6) ; Halaschek-Wiener ; 2005                                                      | 25        | 68         | 234          | 19057        | 7.64E-31    | 1.21E-28   | B0041.4; C07A12.4; C07H6.5; C15H9.6; C26D10.2; C34E10.6; C36E8.5; C42D8.2; DY3.2; F25H5.4; F33H1.2; F59D8.1; F59D8.2; H28O16.1; K01G5.7; K07H8.6; K08H10.1; K09F5.2; M03F4.2; T03E6.7; T05E11.3; T25C8.2; Y41E3.10; Y69A2AR.18; ZK829.4 |
| Proteome changes <i>S. aureus</i> ; Bogaerts ; 2010                                                | 17        | 68         | 109          | 19057        | 7.22E-24    | 1.14E-21   | T05E11.3; T25C8.2; Y113G7A.3; Y38A10A.5; Y49A3A.2                                                                                                                                                                                       |
| Differentially expressed proteins in crt-1;cnx-1 vs N2 at 20C ; Lee ; 2006                         | 7         | 68         | 13           | 19057        | 9.04E-15    | 1.43E-12   | C07A12.4; C15H9.6; C42D8.2; F58G1.4; K12G11.3; M03F4.2; Y49A3A.2                                                                                                                                                                        |
| Protein expression ; Kim ; 2001                                                                    | 14        | 68         | 446          | 19057        | 4.70E-10    | 7.42E-08   | Y41E3.10; Y48A6B.3                                                                                                                                                                                                                      |
| Proteome changes <i>Aeromonas h.</i> ; Bogaerts ; 2010                                             | 7         | 68         | 64           | 19057        | 2.84E-09    | 4.48E-07   | F25H2.10; K07H8.6; K12G11.3; M6.1; Y22D7AL.5; Y41E3.10; Y45G12B.1                                                                                                                                                                       |
| >=2 down dauer ; Halaschek-Wiener ; 2005                                                           | 6         | 68         | 36           | 19057        | 2.95E-09    | 4.66E-07   | C42D8.2; F59D8.1; F59D8.2; K01G5.7; K07H8.6; K09F5.2                                                                                                                                                                                    |
| Ortholog_Worm,Fly ; McCarroll ; 2004                                                               | 35        | 68         | 3707         | 19057        | 3.37E-09    | 5.33E-07   | ZK829.4                                                                                                                                                                                                                                 |
| 828 genes marked by O-GlcNAc ; Love ; 2009                                                         | 16        | 68         | 828          | 19057        | 2.46E-08    | 3.89E-06   | T22F3.3; Y22D7AL.5; Y38A10A.5; ZK829.4                                                                                                                                                                                                  |
| Differentially expressed proteins in crt-1;cnx-1 vs N2 at 25C ; Lee ; 2006                         | 4         | 68         | 12           | 19057        | 7.18E-08    | 1.13E-05   | C07A12.4; C15H9.6; C42D8.2; M03F4.2                                                                                                                                                                                                     |
| up >1,75 fold in <i>M. luteus</i> versus <i>Pseudomonas sp</i> ; Coolon ; 2009                     | 6         | 68         | 69           | 19057        | 1.66E-07    | 2.62E-05   | F25H2.10; F54H12.6; K09F5.2; M03F4.2; T03E6.7; Y55B1AR.1                                                                                                                                                                                |
| Glycoproteins Gal6 binding ; Kaji ; 2007                                                           | 9         | 68         | 287          | 19057        | 7.96E-07    | 1.26E-04   | C42D8.2; F09B12.3; F54F2.1; F57F4.4; F59D8.1; F59D8.2; K09F5.2; T14G8.3; T24H7.2                                                                                                                                                        |
| Heat shock ; Kim ; 2001                                                                            | 4         | 68         | 25           | 19057        | 1.77E-06    | 2.80E-04   | C15H9.6; T05E11.3; T14G8.3; Y22D7AL.5                                                                                                                                                                                                   |
| Cell structural,muscle ; Kim ; 2001                                                                | 9         | 68         | 332          | 19057        | 2.65E-06    | 4.18E-04   | C36E8.5; C43C3.1; DY3.2; F08B6.4; F11C3.3; K01G5.7; M03F4.2; M6.1; T25C8.2                                                                                                                                                              |
| down after Organophosphorus pesticide chlorpyrifos + diazinon ; Vinuela ; 2010                     | 5         | 68         | 65           | 19057        | 3.49E-06    | 5.51E-04   | C42D8.2; F59D8.1; F59D8.2; K07H8.6; K09F5.2                                                                                                                                                                                             |
| Glycoproteins Con A binding ; Kaji ; 2007                                                          | 11        | 68         | 587          | 19057        | 6.72E-06    | 1.06E-03   | C07A12.4; C42D8.2; F09B12.3; F54F2.1; F57F4.4; F59D8.1; F59D8.2; K07H8.6; T03E6.7; T14G8.3; T24H7.2                                                                                                                                     |
| Regulated DOWN_daf2 mutant&RNAi,Class2,-IGF1 ; Murphy ; 2003                                       | 7         | 68         | 222          | 19057        | 1.40E-05    | 2.22E-03   | C07H6.5; C42D8.2; F57F4.4; F58G1.4; F59D8.1; F59D8.2; T03E6.7                                                                                                                                                                           |
| down >1,75 fold in <i>Pseudomonas sp</i> vs <i>E. coli</i> ; Coolon ; 2009                         | 4         | 68         | 44           | 19057        | 1.81E-05    | 2.86E-03   | F25H2.10; F54H12.6; M03F4.2; Y69A2AR.18                                                                                                                                                                                                 |
| down after Organophosphorus pesticide diazinon ; Vinuela ; 2010                                    | 5         | 68         | 121          | 19057        | 7.19E-05    | 1.14E-02   | C42D8.2; F59D8.1; F59D8.2; K07H8.6; K09F5.2                                                                                                                                                                                             |
| Regulated DOWN_Bt toxin,Cry5B ; Huffman ; 2004                                                     | 8         | 68         | 442          | 19057        | 0.00017     | 2.72E-02   | F09B12.3; F57F4.4; F58G1.4; K09F5.2; M6.1; R05G6.7; Y48A6B.3; ZK455.1                                                                                                                                                                   |
| Differentially expressed proteins in crt-1vs N2 at 20C ; Lee ; 2006                                | 2         | 68         | 7            | 19057        | 0.00026     | 4.11E-02   | C07A12.4; C15H9.6                                                                                                                                                                                                                       |
| Expressed in the epidermis ; Wormbase WS220                                                        | 11        | 68         | 888          | 19057        | 0.00028     | 4.49E-02   | C07A12.4; C34E10.6; F10C1.2; H28O16.1; M6.1; R05G6.7; T03E6.7; Y113G7A.3; Y38A10A.5; Y69A2AR.18; ZK455.1                                                                                                                                |
| Age-Regulated Genes ; Budovskaya ; 2008                                                            | 12        | 68         | 1084         | 19057        | 0.00041     | 6.45E-02   | C18A11.7; C42D8.2; F09B12.3; F10C1.2; F47B10.1; F57F4.4; K07H8.6; K09F5.2; K10B3.7; K12G11.3; T03E6.7; Y49A3A.2                                                                                                                         |
| Regulated DOWN_Cadmium ; Huffman ; 2004                                                            | 7         | 68         | 388          | 19057        | 0.00046     | 7.23E-02   | C42D8.2; F09B12.3; F57F4.4; R05G6.7; Y48A6B.3; Y49A3A.2; ZK455.1                                                                                                                                                                        |
| Energy generation ; Kim ; 2001                                                                     | 4         | 68         | 104          | 19057        | 0.00052     | 8.24E-02   | C34E10.6; F47B10.1; H28O16.1; K10B3.7                                                                                                                                                                                                   |
| up >1,75 fold in <i>B. megaterium</i> versus <i>Pseudomonas sp</i> ; Coolon ; 2009                 | 3         | 68         | 45           | 19057        | 0.00055     | 8.75E-02   | F25H2.10; F54H12.6; M03F4.2                                                                                                                                                                                                             |
| >=2 down oxidative stress ; Park ; 2009                                                            | 2         | 68         | 13           | 19057        | 0.00095     | 1.51E-01   | F58G1.4; T21G5.3                                                                                                                                                                                                                        |
| DNA synthesis ; Kim ; 2001                                                                         | 7         | 68         | 440          | 19057        | 0.00096     | 1.52E-01   | C34E10.6; F47B10.1; H28O16.1; K10B3.7; T22F3.3; ZK455.1; ZK829.4                                                                                                                                                                        |
| UP>=2 by PA14 8h ; Troemel ; 2006                                                                  | 5         | 68         | 233          | 19057        | 0.00146     | 2.30E-01   | F09B12.3; F59D8.1; F59D8.2; K09F5.2; Y39G8B.1                                                                                                                                                                                           |
| Overlap Between Oxidative Stress and Aging- DOWN-regulated genes by oxidative stress ; Park ; 2009 | 3         | 68         | 66           | 19057        | 0.00169     | 2.68E-01   | F10C1.2; F47B10.1; Y49A3A.2                                                                                                                                                                                                             |
| Infection-Upregulated P.luminescens ; Wong ; 2007                                                  | 8         | 68         | 652          | 19057        | 0.00218     | 3.44E-01   | F40F9.6; F57F4.4; F58G1.4; K08H10.1; K12G11.3; Y38A10A.5; Y49A3A.2; Y55B1AR.1                                                                                                                                                           |
| down after Organophosphorus pesticide chlorpyrifos ; Vinuela ; 2010                                | 6         | 68         | 389          | 19057        | 0.00262     | 4.15E-01   | C42D8.2; F10C1.2; F59D8.1; K07H8.6; K09F5.2; K12G11.3                                                                                                                                                                                   |
| Regulated DOWN_>2fold,Dauer/[Dauer+12hrs] ; McElwee ; 2004                                         | 11        | 68         | 1175         | 19057        | 0.00280     | 4.42E-01   | C07A12.4; C18A11.7; C36E8.5; C43C3.1; F09B12.3; F10C1.2; F47B10.1; F54F2.1; F57B9.6; Y48A6B.3; ZK455.1                                                                                                                                  |
| Genes Downregulated in ets-4(ok165) ; Thyagarajan ; 2010                                           | 3         | 68         | 88           | 19057        | 0.00384     | 6.07E-01   | C42D8.2; F59D8.1; F59D8.2                                                                                                                                                                                                               |
| >=2 up from D6 to D10 ub daf-2 ; Halaschek-Wiener ; 2005                                           | 2         | 68         | 27           | 19057        | 0.00416     | 6.57E-01   | B0041.4; C15H9.6                                                                                                                                                                                                                        |
| >=2 down after 8 h infection with <i>S. aureus</i> ; Irazoqui ; 2010                               | 4         | 68         | 198          | 19057        | 0.00548     | 8.66E-01   | C18A11.7; F09B12.3; F59D8.1; K09F5.2                                                                                                                                                                                                    |
| Down >0.5x after <i>B. thuringiensis</i> infection in N2 ; Boehnisch ; 2011                        | 2         | 68         | 35           | 19114        | 0.00688     | 1.00E+00   | F59D8.1; K09F5.2                                                                                                                                                                                                                        |
| >=2 down from D1 to D6 ub daf-2 ; Halaschek-Wiener ; 2005                                          | 2         | 68         | 35           | 19057        | 0.00692     | 1.00E+00   | B0041.4; C15H9.6                                                                                                                                                                                                                        |
| Regulated DOWN_various genes,xenobiotics ; Reichert ; 2005                                         | 2         | 68         | 39           | 19057        | 0.00854     | 1.00E+00   | K07H8.6; K09F5.2                                                                                                                                                                                                                        |
| Regulated UP_in dys1 mutants ; Towers ; 2006                                                       | 2         | 68         | 41           | 19057        | 0.00940     | 1.00E+00   | F59D8.1; M6.1                                                                                                                                                                                                                           |
| down skn-1 mutant, normal culture condition ; Oliveira ; 2009                                      | 4         | 68         | 232          | 19057        | 0.00949     | 1.00E+00   | C43C3.1; F09B12.3; T25C8.2; ZK455.1                                                                                                                                                                                                     |



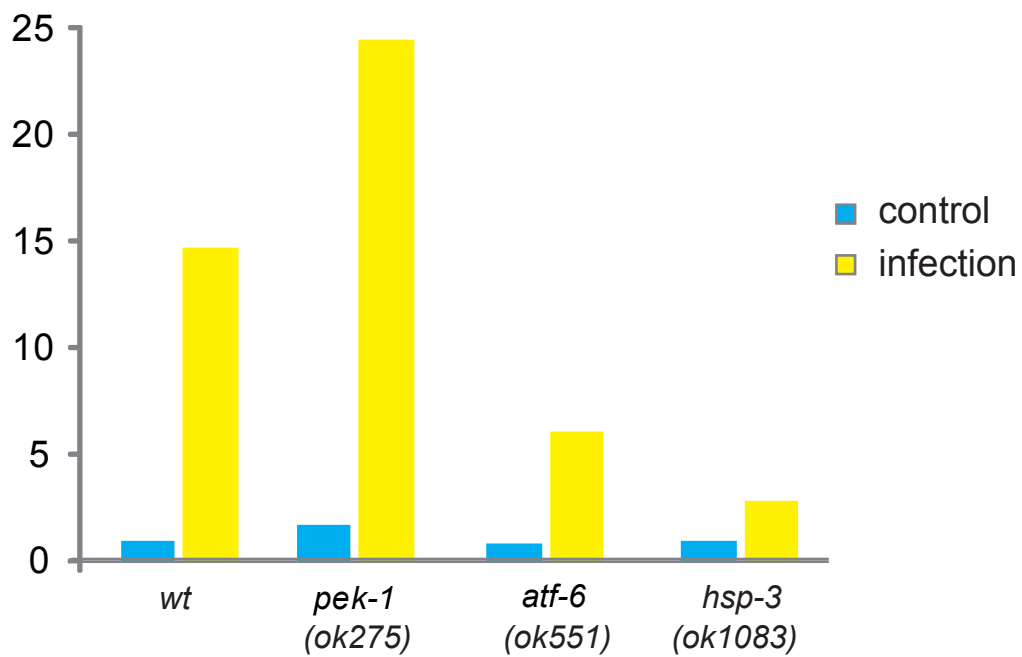

**Supplementary Figure 1.** Quantification of *pnlp-29::GFP* expression in different mutant backgrounds following infection. The normalized average ratio of green fluorescence to TOF is shown. The analysis was restricted to worms with a TOF above 450. The results shown are representative of several independent experiments. It should be noted that for reasons that are currently unclear, the decreased fluorescence ratio seen in the *atf-6* mutant was not always (3/7 experiments) obvious.
